# Supplementary material for: Design and synthesis of a cyclitol-derived scaffold with axial pyridyl appendages and its encapsulation of the silver(I) cation
Source: publisher site journal article supplement (doi:10.3762/bjoc.6.115), 2010-10-29

# **Supporting Information**

## **for**

### **Design and synthesis of a cyclitol-derived scaffold with axial pyridyl appendages and its encapsulation of the silver(I) cation**

Pierre-Marc Léo, Christophe Morin\* and Christian Philouze

Address: Département de Chimie Moléculaire (CNRS, UMR 5250, ICMG FR-2607)

Université Joseph Fourier, 301 Rue de la Chimie, 38402 Grenoble Cedex, France.

Email: Christophe Morin\* - [Christophe.Morin@ujf-grenoble.fr](mailto:Christophe.Morin@ujf-grenoble.fr)

\*Corresponding author

#### **Synthesis and characterisation data for compounds 1–9 and 1·Ag(I).**

Pages S1–S3: Synthetic procedures.

Page S3: Determination of stability constant

Pages S3–S5: Radiocrystallographic analysis of Ag complex.

Pages S6–S7: Electrospray mass spectrum of Ag complex

Pages S8–S21: 300 MHz  $^1\text{H}$  NMR and 75 MHz  $^{13}\text{C}$  NMR spectra.

#### **Synthetic procedures**

**2-Picolyl chloride.** A solution of sodium bicarbonate (3 g) in water (50 mL) was added with stirring to 2-picolyl chloride hydrochloride (3 g, 18.3 mmol) (caution: foaming). When the foaming had subsided, the mixture was extracted with diethyl ether and the organic layer washed with water and dried (sodium sulfate). After evaporation of the ether a red residue (which can be stored under argon in the cold) was obtained. Purification was carried out immediately before use by column chromatography on basic alumina (activity I) eluting with diethyl ether.

**2-*O*-tert-Butyldimethylsilyl-*myo*-inositol-1,3,5-orthobenzoate (3)** [procedure adapted from S. Angyal, *Carbohydr. Res.* **2000**, 325, 313-320]. Under an argon atmosphere, 2,6-lutidine (1.8 g, 42 mmol) followed by *tert*-butyldimethylsilyl chloride (1.0 g, 29.75 mmol) was added to a solution of *myo*-inositol orthophenylacetate (**2**) [Bhosekar, G., Murali, C, Gonnade, R.G., Shashidar, M.S., Bhadbhade, M.M. *Cryst. Growth Des.* **2005**, 5, 1977-1982] (1.75 g, 17.5 mmol) in dry DMF (14 mL). After 2 day, the mixture was concentrated to half-volume (bath temperature 80 °C) and water (10 mL) added. On cooling and filtration **3** was obtained, (1.75 g, 70%).

**2-*O*-tert-Butyldimethylsilyl-4,6-di-*O*-(2-picolyl)-*myo*-inositol-1,3,5-orthobenzoate (4)**. At 0 °C, to a stirred solution of **3** (1.52 g, 4 mmol) in dry DMF (10 mL) was added sodium hydride (0.35 g of a 60% dispersion in mineral oil, 8.8 mmol). When evolution of gas had ceased, freshly prepared 2-picolyl chloride (2.55 g, 20 mmol) and a catalytic quantity of sodium iodide were added. After overnight stirring (with protection from light), water was added and the reaction mixture extracted with 1:1 diethyl ether/pentane. The organic layer was dried, concentrated and the residue purified by column chromatography on silica gel (elution with 97:3 dichloromethane/methanol) to give **4** (1.63 g, 65%).

**2,4-Di-*O*-(2-picolyl)-*myo*-inositol-1,3,5-orthobenzoate (5)**. Under an argon atmosphere, a 1 *M* solution of tetrabutylammonium fluoride in THF (4.5 mL, 4.5 mmol) was added *via* syringe to a solution of **4** (1.58 g, 2.81 mmol) in dry THF (7 mL). After 3 h stirring, water was added and the reaction mixture extracted with dichloromethane. After drying and evaporation of the volatiles, column chromatography on silica gel (elution with 95:5 dichloromethane/methanol) gave **5** (1.03 g, 86%).

**4,6-Di-*O*-(2-picolyl)-*myo*/scyllo-inos-2-ose-1,3,5-orthobenzoate (6)**. Freshly distilled oxalyl chloride (0.76 g, 5.98 mmol) was added to dry dichloromethane (2.5 mL) and the solution stirred under an argon atmosphere at -70 °C. Dry DMSO (0.75 mL) was cautiously added dropwise, followed after 5 min by the dropwise addition of a solution of **5** (0.8 g, 1.79 mmol) in dichloromethane (2.5 mL). The solution was stirred at -30 °C for 1 h and then cooled to -70 °C before the addition of dry diethylisopropylamine (4 mL). The cooling bath was removed and after 3 h water was added. The mixture was extracted with dichloromethane, dried and the concentrated. The residue was purified by column chromatography on silica gel (elution with 95:5 dichloromethane/methanol) to afford **6** (0.75 g, 95%).

**2,4-Di-*O*-(2-picolyl)-scyllo-inositol-1,3,5-orthobenzoate (7)**. Sodium borohydride (0.75 g) was added portionwise to a stirred solution of **6** (0.75 g, 1.68 mmol) in methanol (60 mL) at 0 °C (caution: foaming). After 30 min, acetone (1 mL) was added and the volatiles were removed under reduced pressure. Co-evaporation of the residue with methanol was carried out twice before the addition of water. The residue was extracted with dichloromethane and dried. Removal of the solvent afforded **7** (0.76 g, 99%).

**2-*O*-Acetyl-4,6-di-*O*-(2-picolyl)-*myo*-inositol-1,3,5-orthobenzoate (8) and 2-*O*-acetyl-4,6-di-*O*-(2-picolyl)-scyllo-inositol-1,3,5-orthobenzoate (9)** were prepared from **5** and **7** respectively by standard methods (Ac<sub>2</sub>O, pyridine, RT, overnight).

**2,4,6-Tri-*O*-(2-picolyl)-scyllo-inositol-1,3,5-orthobenzoate (1)**. A solution of **7** (0.63 g, 1.40 mmol) in dry DMF (6 mL) was stirred at 0 °C and sodium hydride (0.15 g of a 60% dispersion in mineral oil, 3.9 mmol) added. When evolution of gas had ceased, freshly prepared 2-picolyl chloride (0.54 g, 4.24 mmol) was added and stirring continued for 3 h.

After hydrolysis, the mixture was extracted with 1:1 diethyl ether/pentane. The organic layer was dried, concentrated and purified by column chromatography on silica gel (elution with 95:5 dichloromethane/methanol) to afford **1** (0.54 g, 71%).

**Silver(I) 2,4,6-tri-*O*-(2-picolyl)-scyllo-inositol-1,3,5-orthobenzoato trifluoromethanesulfonate** (**1**·AgSO<sub>3</sub>CF<sub>3</sub>) Silver(I) trifluoromethanesulfonate (19.020 mg, 35.6 μmol) and **1** (9.151 mg, 35.6 μmol) were dissolved in hot ethanol (1 mL) and after some cooling, methanol (1 mL) was added. A cotton plug was placed on top of vial to allow slow evaporation of the solvents, which led to crystals suitable for crystallographic analysis. Mp: 170 °C (softens), 190 °C (fully melts). IR (film): ν 2878 (w), 1601 (s), 1574 (w), 1371 (s), 1305 (s), 1027 (m), 761 (s) cm<sup>-1</sup>. Crystallographic data: pp S3–S5; Electrospray MS: pp S6–S7; NMR spectra: pp S8 and S10.

### Determination of the stability constant

Spectrophotometric titration of **1** ( $1.96 \cdot 10^{-4}$  M) with a solution of AgSO<sub>3</sub>CF<sub>3</sub> ( $2.135 \cdot 10^{-3}$  M) was carried out at 25°C in H<sub>2</sub>O:MeOH (1:1) on a Varian Cary 50 UV–visible spectrophotometer equipped with a Peltier thermostating accessory. The absorbance data were processed with the SPECFIT program. The best fit was obtained by considering the formation of 1:1 complex.

### Radiocrystallographic analysis

*Crystal mounting and data collection:* a prismatic crystal (0.40 x 0.30 x 0.07 mm) was selected and mounted on a glass fiber using epoxy resin. Recording of data was performed at 200 °K using a Bruker-AXS-Enraf-Nonius kappa CCD diffractometer with monochromatic (graphite) MoKα radiation. EVAL software was used for cell-unit determination, refinement and data reduction. The data were corrected for decays and for Lorentz and polarization effects. The results are summarised in the following table.

| <b>Table: Crystal Data and Structure Refinement</b> |                                                                                                                   |
|-----------------------------------------------------|-------------------------------------------------------------------------------------------------------------------|
| Name                                                | Silver(I) 2,4,6-tri- <i>O</i> -(2-picolyl)- <i>scyllo</i> -inositol-1,3,5-orthobenzoato trifluoromethanesulfonate |
| CCDC deposit no.                                    | CCDC 782357                                                                                                       |
| Color/shape                                         | Colorless/prism                                                                                                   |
| Chemical formula                                    | C <sub>32</sub> H <sub>29</sub> AgF <sub>3</sub> N <sub>3</sub> O <sub>9</sub> S                                  |
| Formula weight                                      | 796.52                                                                                                            |
| Temperature, K                                      | 200                                                                                                               |
| Crystal system                                      | triclinic                                                                                                         |
| Space group                                         | P-1                                                                                                               |
| Unit-cell dimensions                                | a = 11.452(2) Å<br>b = 11.676(3) Å<br>c = 14.389(2) Å<br>α = 98.00(2) °<br>β = 105.78(2) °<br>γ = 118.07(2) °     |
| Unit-cell volume (Å <sup>3</sup> )                  | 1550.8(9)                                                                                                         |
| Z                                                   | 2                                                                                                                 |
| Density (calculated), g/cm <sup>3</sup>             | 1.706                                                                                                             |

|                                          |                                            |
|------------------------------------------|--------------------------------------------|
| Absorption coefficient, mm <sup>-1</sup> | 0.796                                      |
| Diffractometer/scans                     | Bruker-Enraf-Nonius kappaCCD/phi and omega |
| Type of radiation                        | Mo (K $\alpha$ ) :0.71073 Å                |
| $\theta$ range for data collection, (°)  | 1.55-25                                    |
| Reflections measured                     | 16528                                      |
| Independent/observed reflections         | 5495/4741 [I>2 $\sigma$ (I)]               |
| Data/restraints/parameters               | 4741/0/451                                 |
| Goodness of fit on F                     | 1.734                                      |
| Final R indices [I>2 $\sigma$ (I)]       | R1 = 0.0349, wR2 = 0.0470                  |

**Crystal structure determination, refinements and discussion.** The structure was solved using direct methods from SIR-92 [Altomare A, Cascarano G, Giacovazzo C, Guagliardi A *J Appl Cryst* **1993**, 26, 343]; C, Ag, F, N, O, S, atoms were refined anisotropically by the full matrix least-squares method and H atoms were calculated from idealised positions. Drawing of the molecular structure was realised with the use of ORTEP [Johnson CK (**1976**) ORTEPII. Report ORNL-5138. Oak Ridge National Laboratory, Oak Ridge, Tennessee, USA].

The silver complex (**1**·AgSO<sub>2</sub>CF<sub>3</sub>) crystallises in the triclinic system which contains few symmetry operations. The complex displays a pseudo ternary axis passing through the silver cation and the C6 C7 bond. This is a pseudo ternary axis however, as one of the pyridyl groups (bearing N3) does not obey symmetry due to slight statistical disorder as evidenced by the two possible positions of C26 atom which is spread over two different positions (C26a and C26b). This disorder may cause two slightly different orientations of the pyridine group, which are too close however to be refined separately (hence the unusual ellipsoid at C30). As a consequence a pseudo mirror plane passing through the pseudo ternary axis and containing the slightly disordered pyridyl group can be observed.

**Table 2.** Selected bond distances and angles

|            |           |
|------------|-----------|
| Bond (Å)   |           |
| Ag1 O4     | 2.812(2)  |
| Ag1 O5     | 2.716(1)  |
| Ag1 O6     | 2.778(2)  |
| Ag1 N1     | 2.250(2)  |
| Ag1 N2     | 2.268(2)  |
| Ag1 N3     | 2.313(2)  |
| Angles (°) |           |
| O4 Ag1 O5  | 65.72(5)  |
| O4 Ag1 O6  | 63.32(5)  |
| O4 Ag1 N1  | 65.37(5)  |
| O4 Ag1 N2  | 121.61(6) |
| O4 Ag1 N3  | 120.54(6) |
| O5 Ag1 O6  | 64.27(5)  |
| O5 Ag1 N1  | 124.88(6) |
| O5 Ag1 N2  | 65.23(6)  |
| O5 Ag1 N3  | 114.89(6) |
| O6 Ag1 N1  | 112.20(6) |
| O6 Ag1 N2  | 117.53(6) |
| O6 Ag1 N3  | 65.57(6)  |
| N1 Ag1 N2  | 126.07(6) |
| N1 Ag1 N3  | 110.82(7) |
| N2 Ag1 N3  | 107.61(8) |

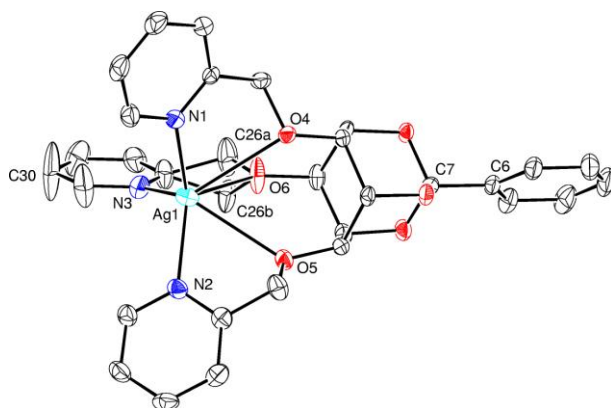

**Figure 1:** ORTEP drawing for the Ag(I) cation complex. H atoms were omitted for clarity. Ellipsoids were drawn at the 50% probability level.

## Display Report

### Analysis Info

Analysis Name D:\Data\Serco\Christophe Morin\_1\_01\_4828.d  
 Method 09\_07\_2008\_passeur+masse target mass=600\_4828.m  
 Sample Name Christophe Morin  
 Comment CM3977(Ag)  
 510-4 Mol ds CDCI3+CD3OD dilue 1/100 eau/MeOH/CH2Cl2

Acquisition Date 3/12/2010 9:56:33 AM

Operator Laure  
 Instrument esquire3000 plus

### Acquisition Parameter

|                   |             |              |            |                          |          |
|-------------------|-------------|--------------|------------|--------------------------|----------|
| Ion Source Type   | ESI         | Ion Polarity | Positive   | Alternating Ion Polarity | off      |
| Mass Range Mode   | Std/Normal  | Scan Begin   | 50 m/z     | Scan End                 | 1300 m/z |
| Capillary Exit    | 128.3 Volt  | Skim 1       | 40.0 Volt  | Trap Drive               | 71.5     |
| Accumulation Time | 652 $\mu$ s | Averages     | 20 Spectra | Auto MS/MS               | off      |

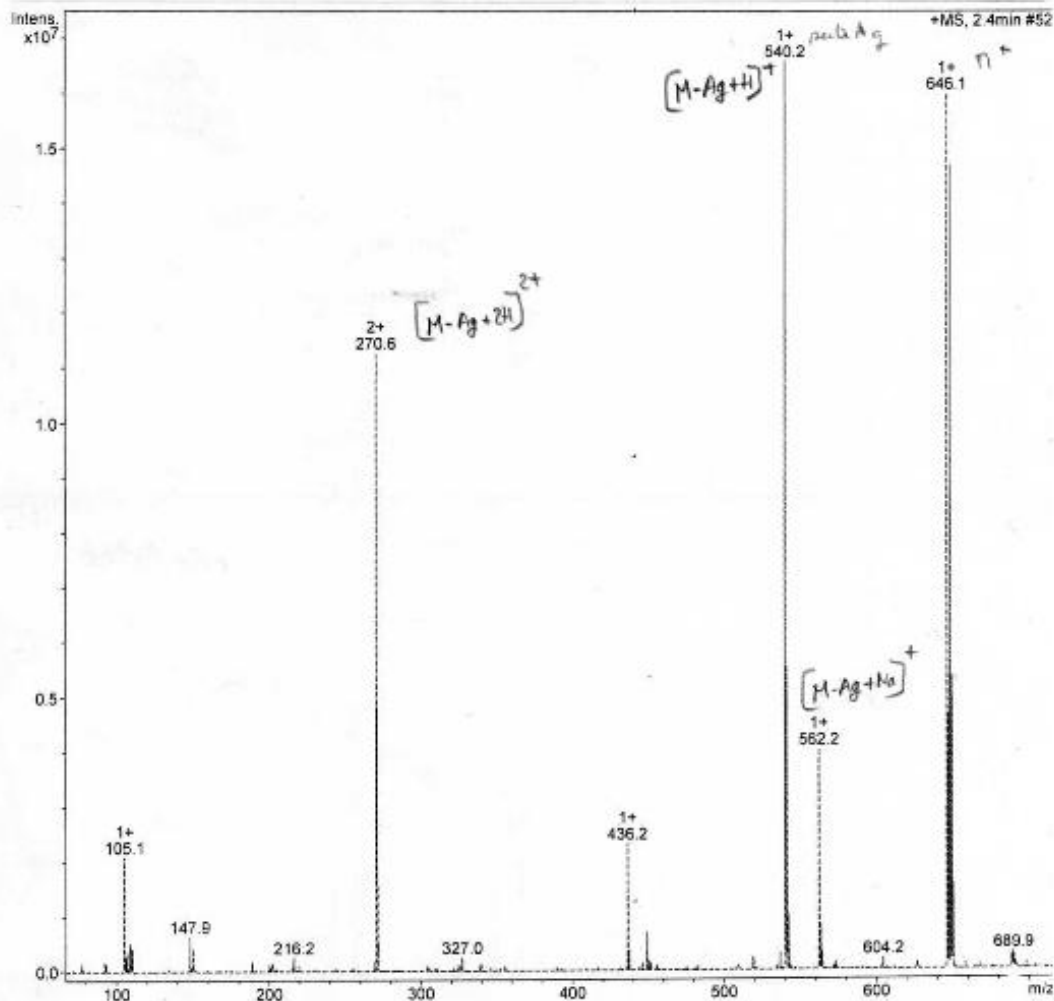

Bruker Daltonics DataAnalysis 3.3

printed: 3/12/2010 10:11:20 AM

Page 1 of 1

1 with AgOSO<sub>2</sub>CF<sub>3</sub>

## Display Report

### Analysis Info

Analysis Name D:\Data\Serco\Christophe Morin\_1\_01\_4828.d  
Method 09\_07\_2008\_passeur+masse target mass=600\_4828.m  
Sample Name Christophe Morin  
Comment CM3977(Ag)  
510-4 Mol ds CDCl3+CD3OD dilue 1/100 eau/MeOH/CH2Cl2

Acquisition Date 3/12/2010 9:56:33 AM

Operator Laure  
Instrument esquire3000 plus

### Acquisition Parameter

|                   |             |              |            |                          |          |
|-------------------|-------------|--------------|------------|--------------------------|----------|
| Ion Source Type   | ESI         | Ion Polarity | Positive   | Alternating Ion Polarity | off      |
| Mass Range Mode   | Std/Normal  | Scan Begin   | 50 m/z     | Scan End                 | 1300 m/z |
| Capillary Exit    | 128.3 Volt  | Skim 1       | 40.0 Volt  | Trap Drive               | 71.5     |
| Accumulation Time | 652 $\mu$ s | Averages     | 20 Spectra | Auto MS/MS               | off      |

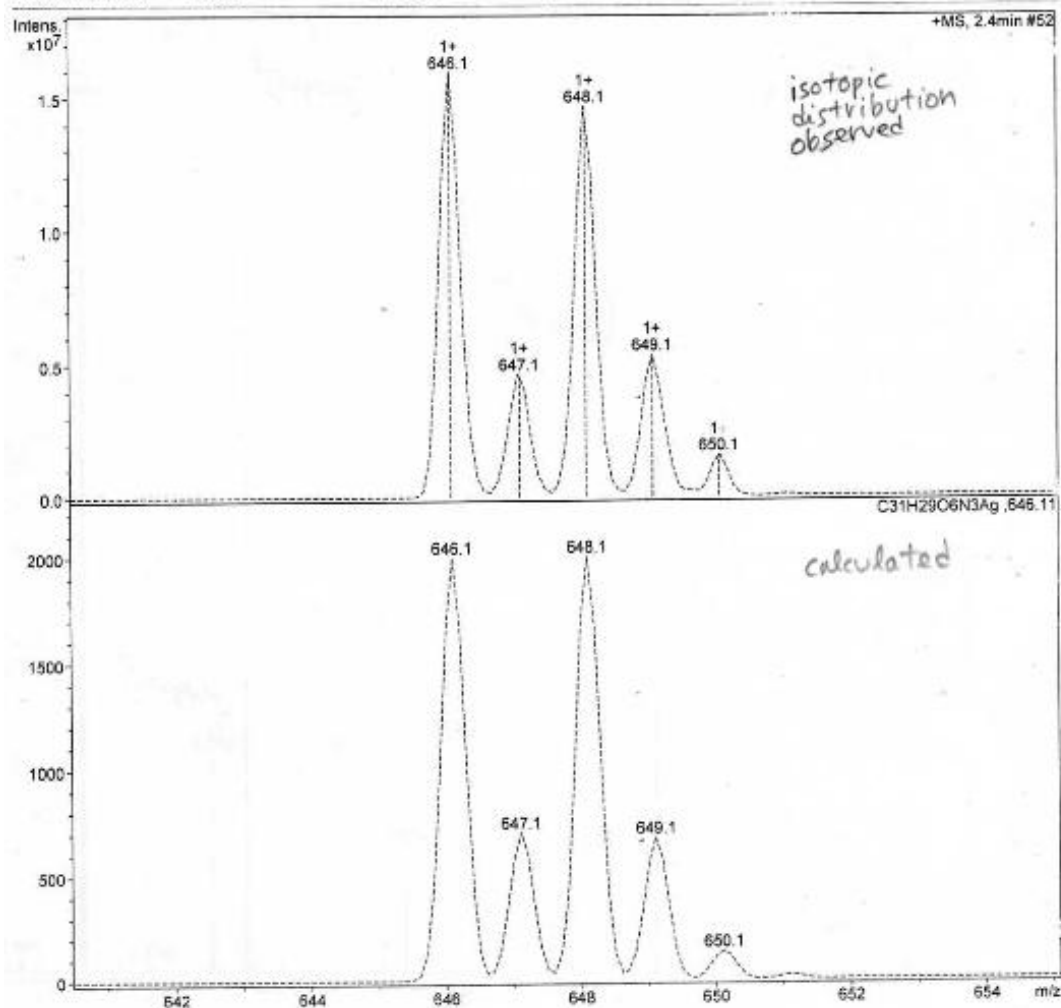

1 with AgOSO<sub>2</sub>CF<sub>3</sub>

79

@proton

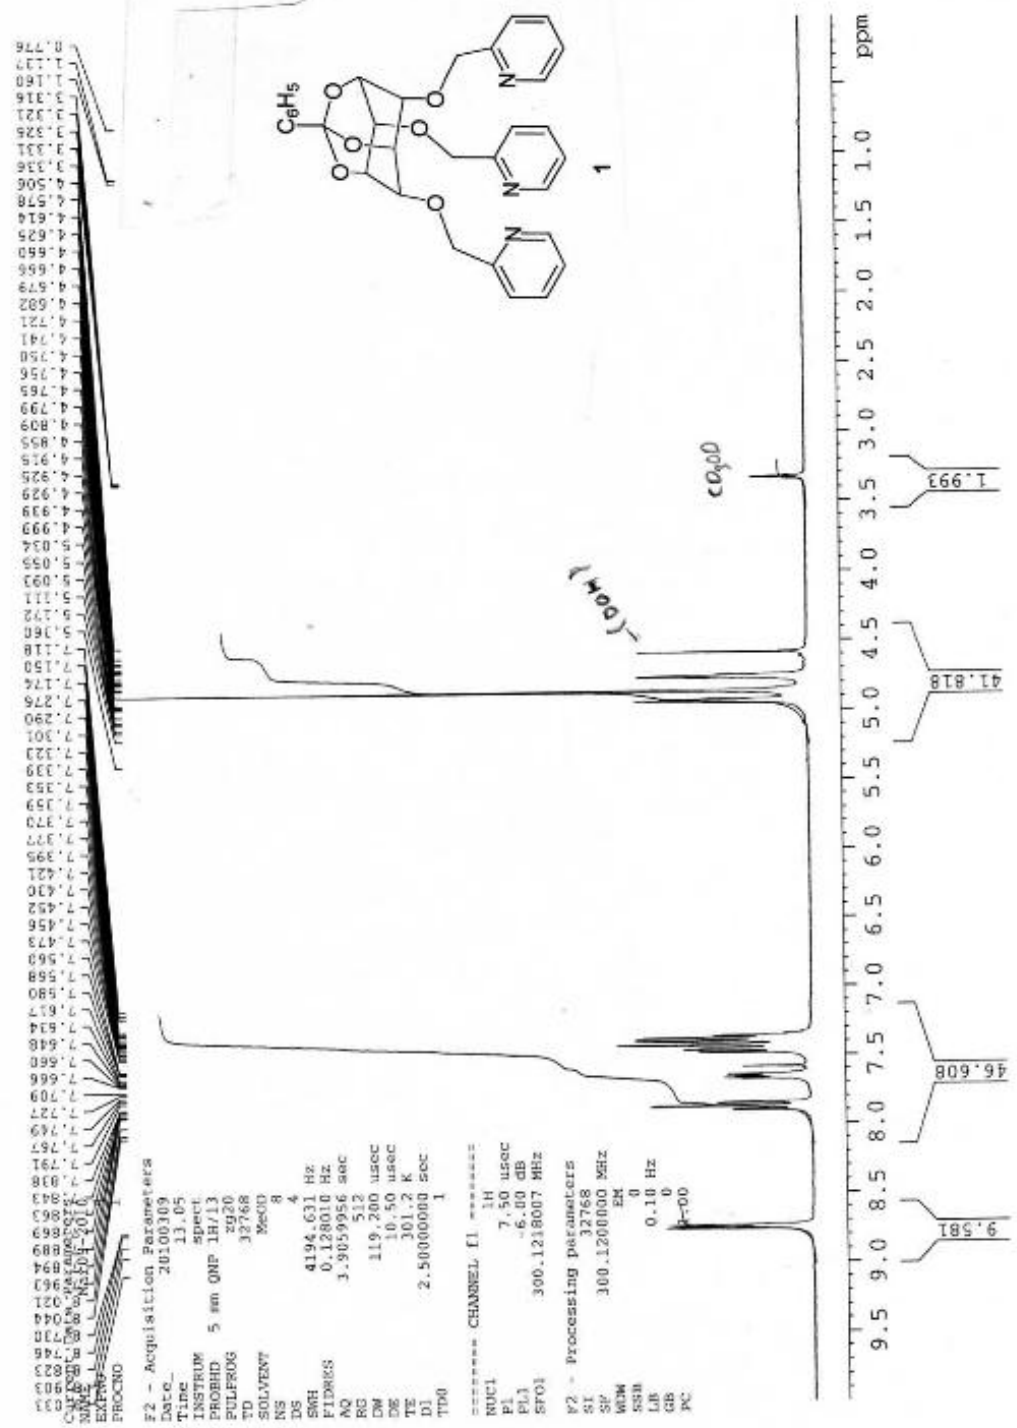





7977

Current Data Parameters  
 NAME: Mar09-2010  
 EXPNO: 7  
 PROCNO: 1  
 F2 - Acquisition Parameters  
 Date\_ 20100109  
 Time 13.31  
 INSTRUM spect  
 PROBRD 5 mm QNP 1H/13  
 PULPROG zgpg30  
 TO 32768  
 SOLVENT NS  
 NS 413

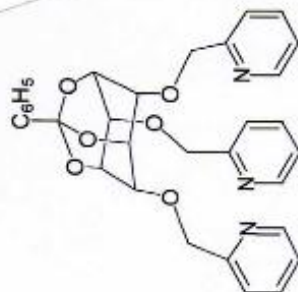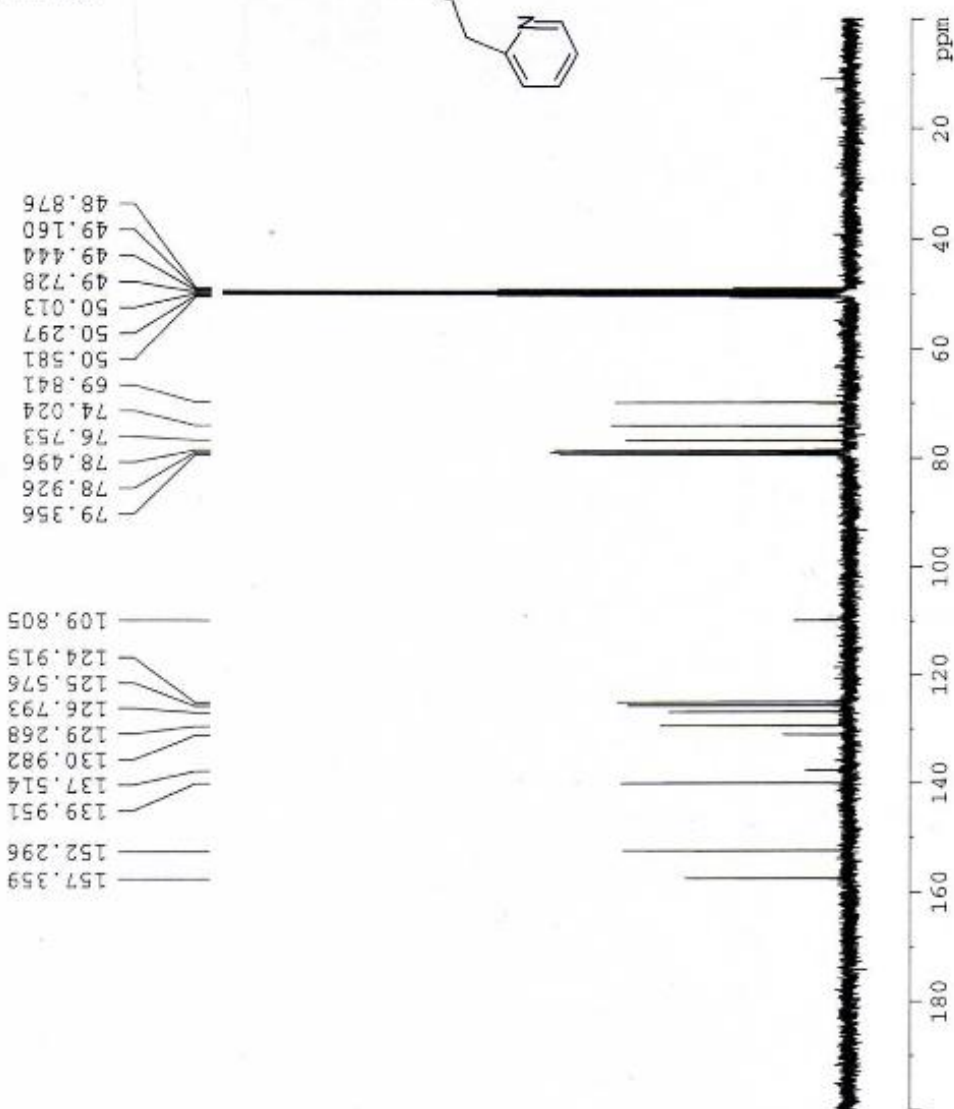

@carbonyl

@carbonyl

Current Data Parameters  
NAME: Nov09-2010  
EXPNO: 2  
PROCNO: 1

F2 - Acquisition Parameters  
Date\_: 20100309  
Time: 12.57  
INSTRUM: spect  
PROBHD: 5 mm QNP 1H/13  
PULPROG: zgpg10  
TD: 32768  
SOLVENT: MeOD  
NS: 363

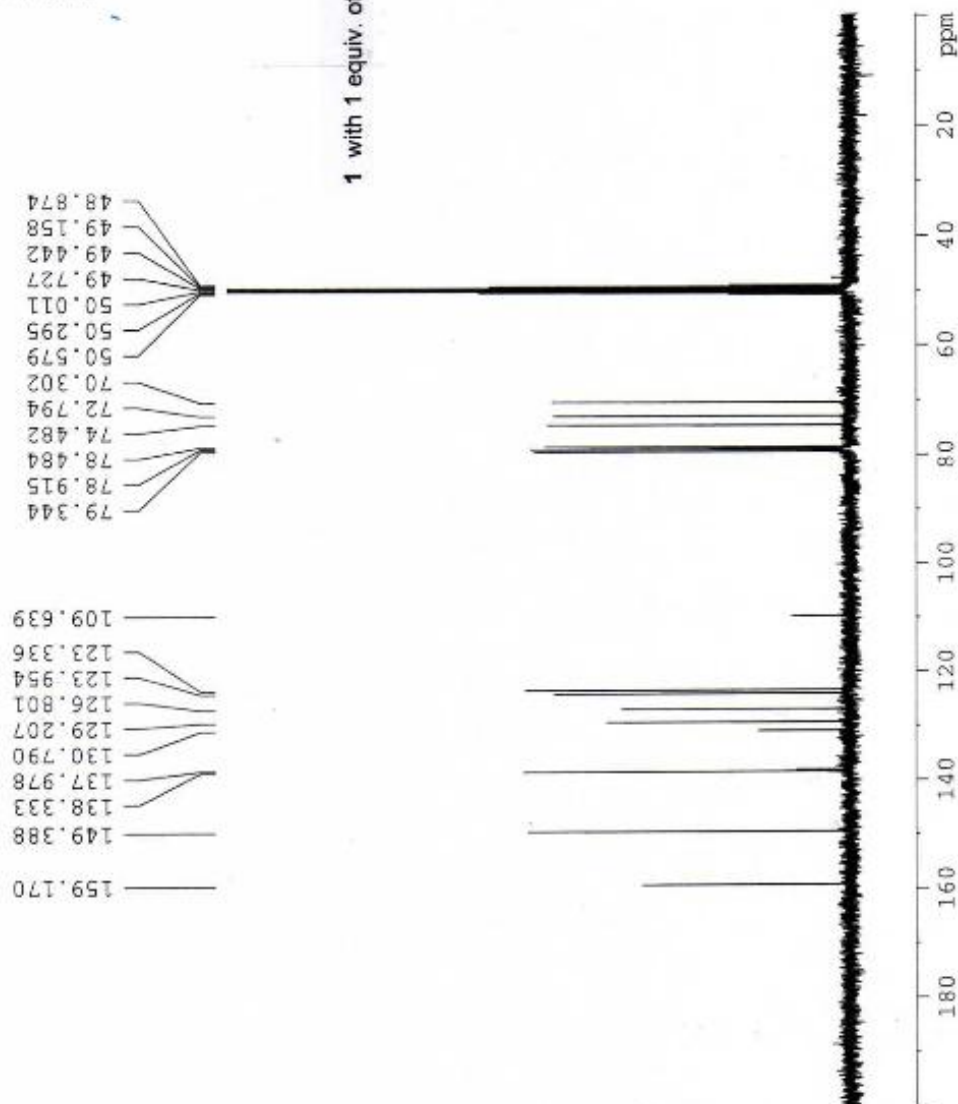

—4.08 CDCL<sub>3</sub> (Leoj4.08) 300 MHz ap crist

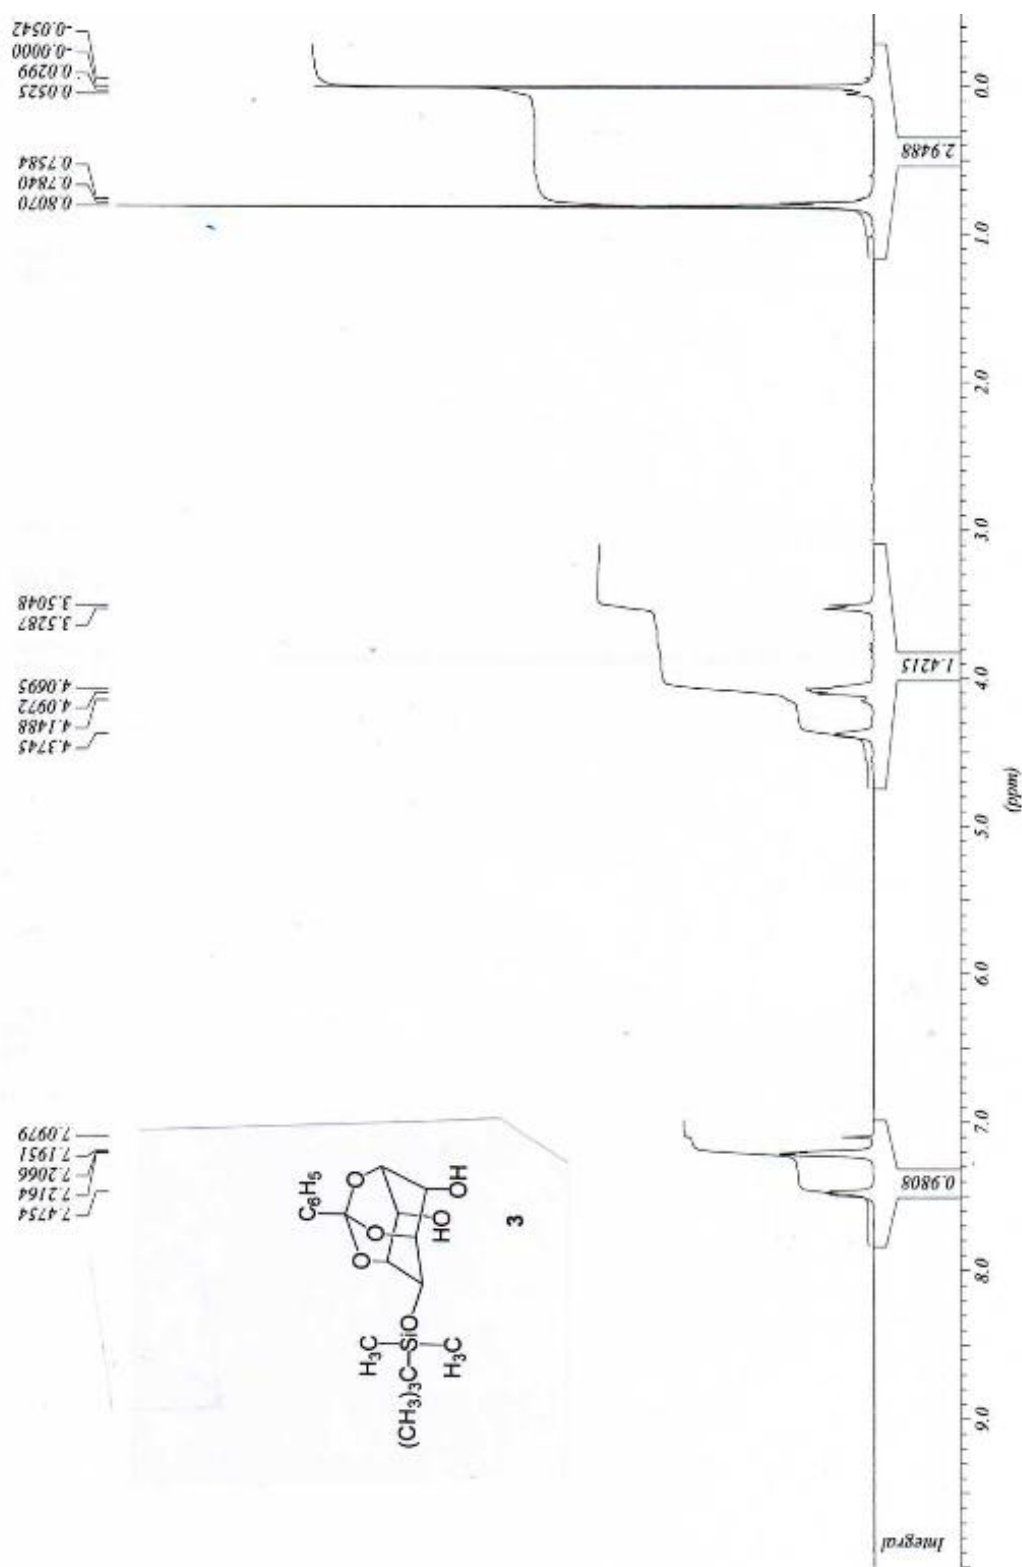

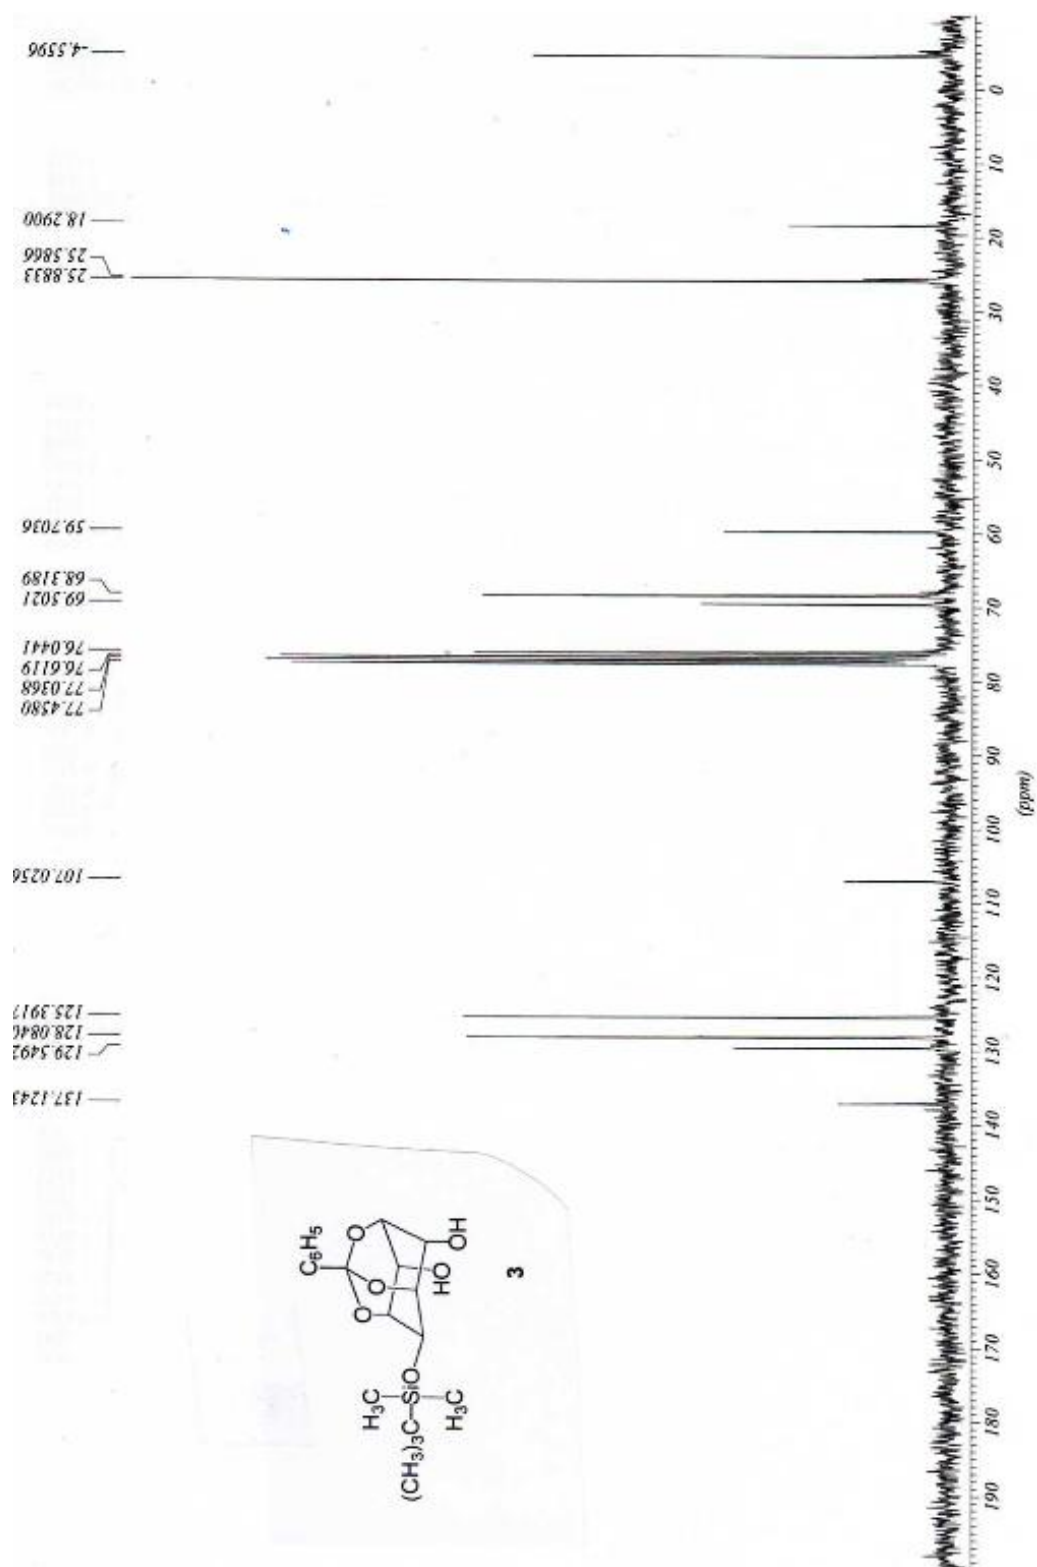

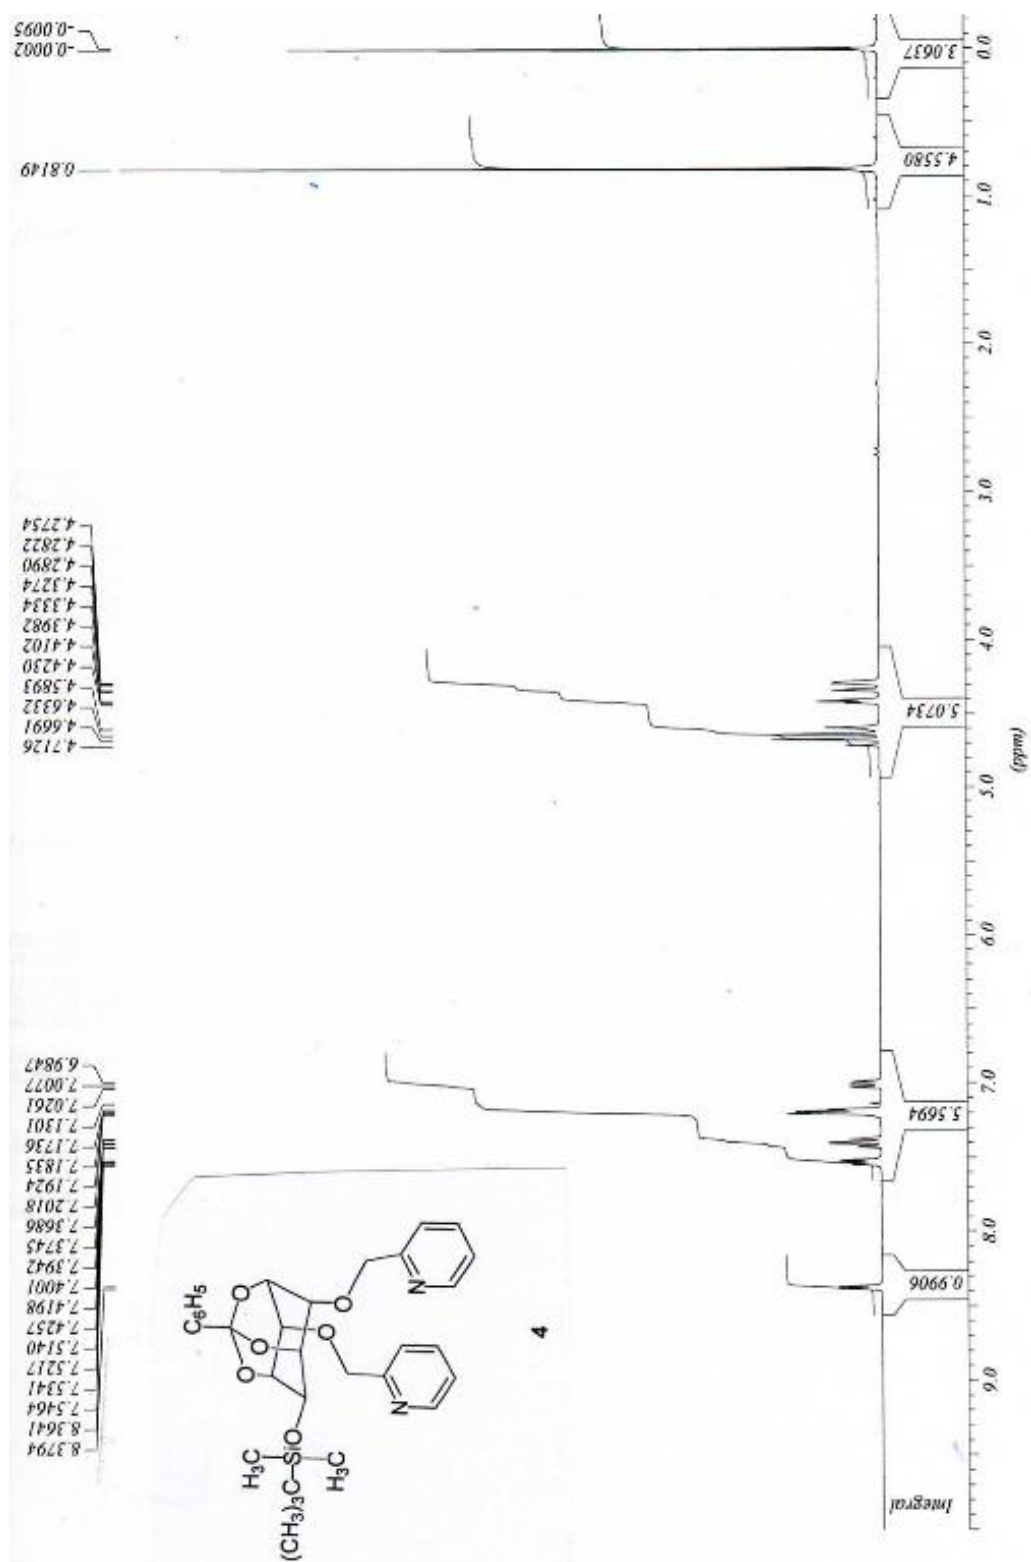

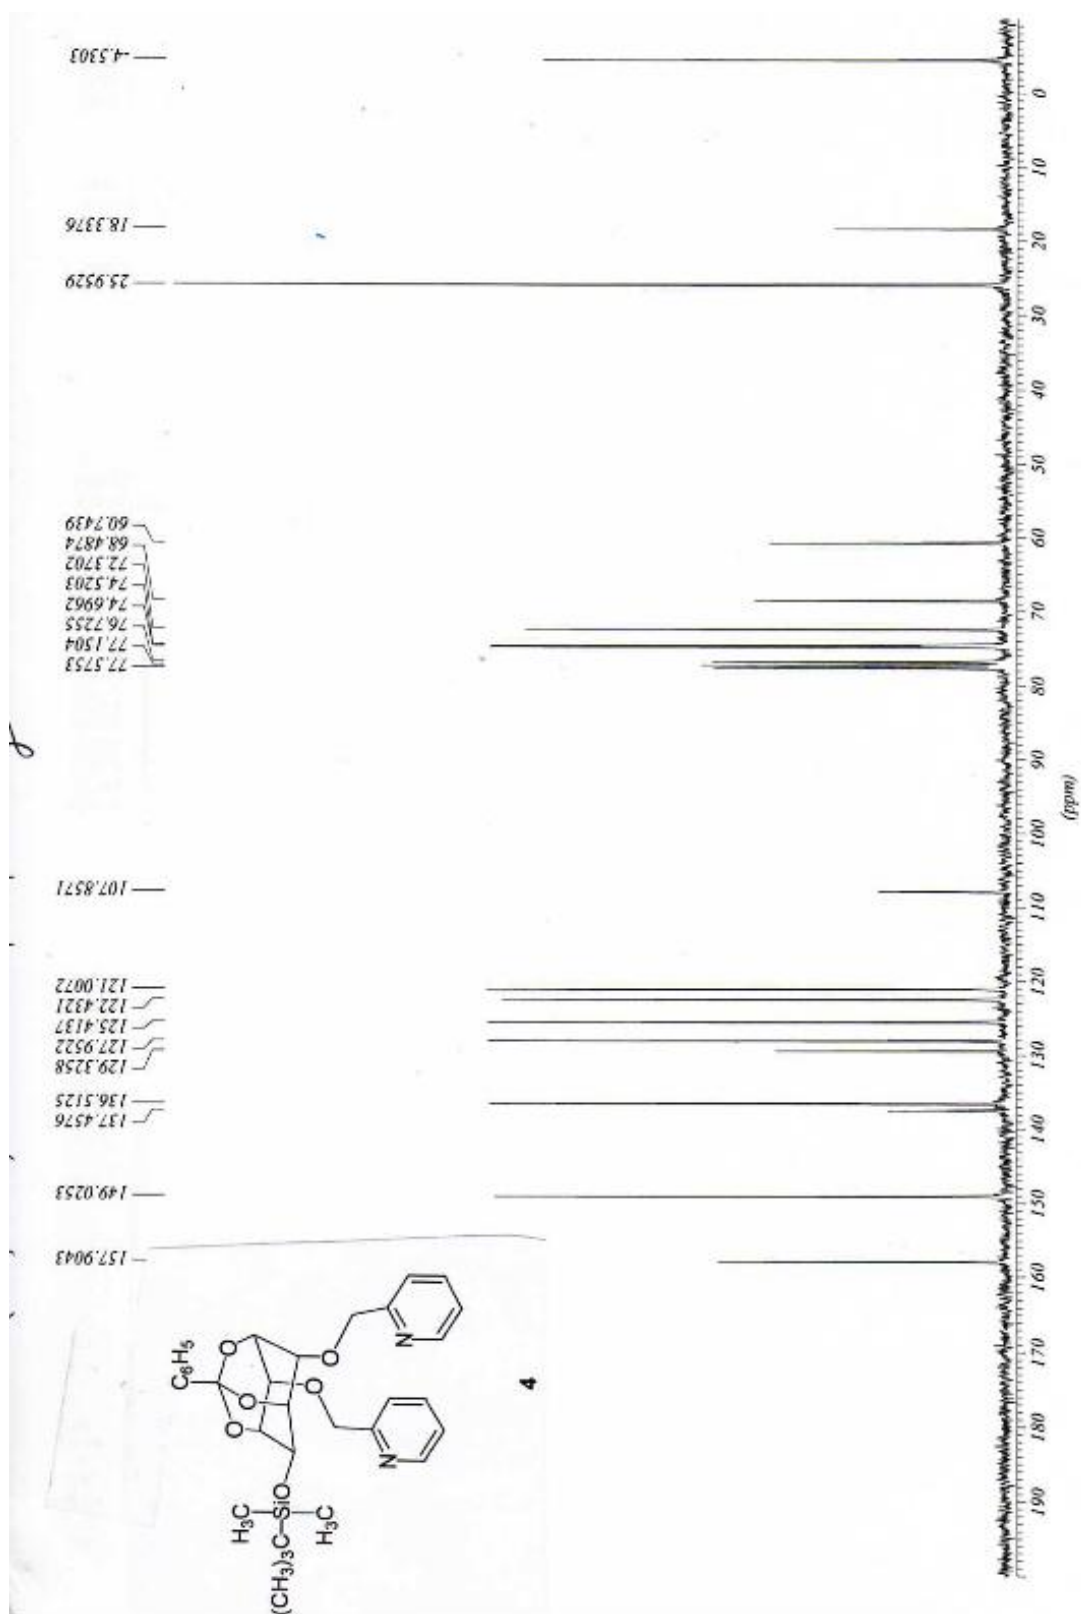

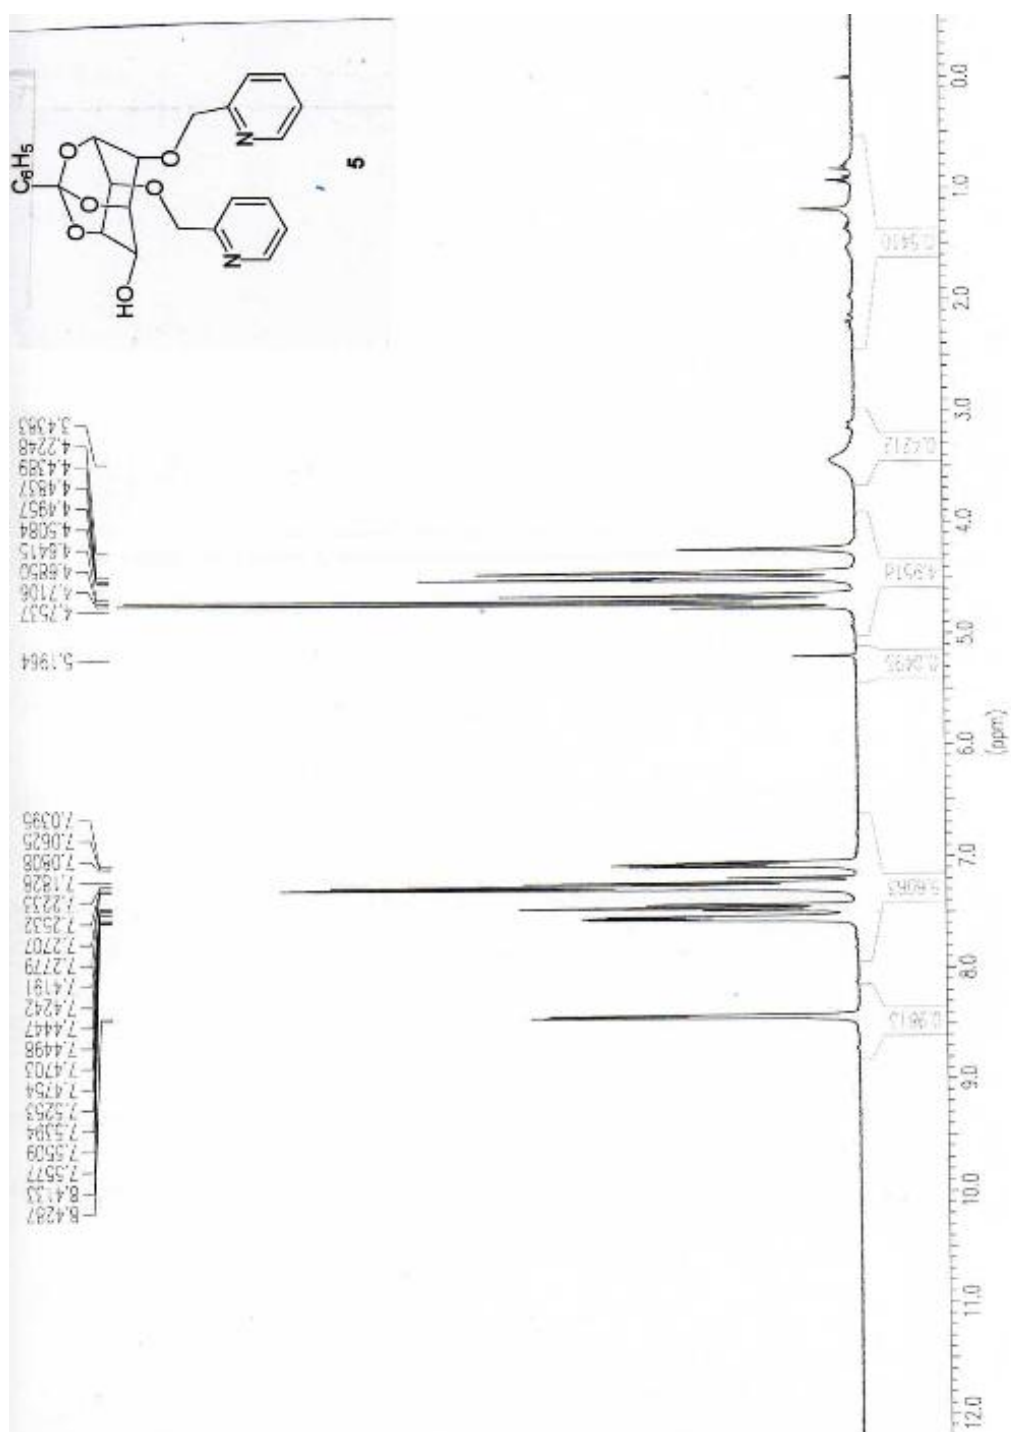



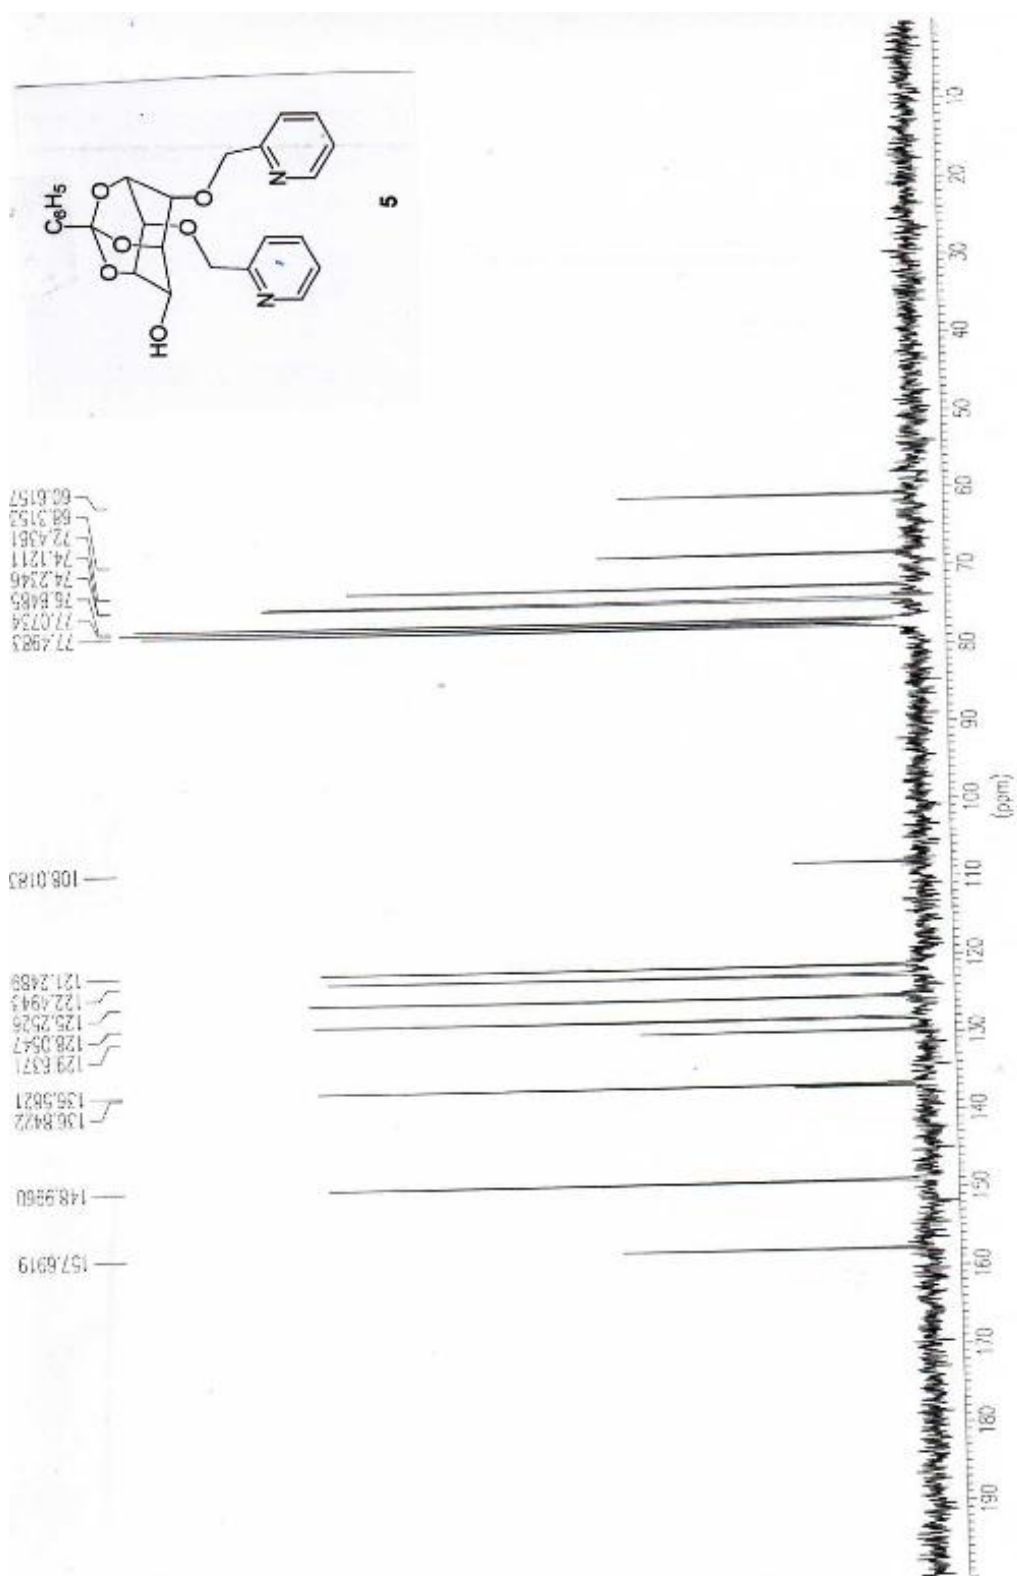

08 CDCL3 (Leoms7a.08) 300MHZ ap sep 0.76g

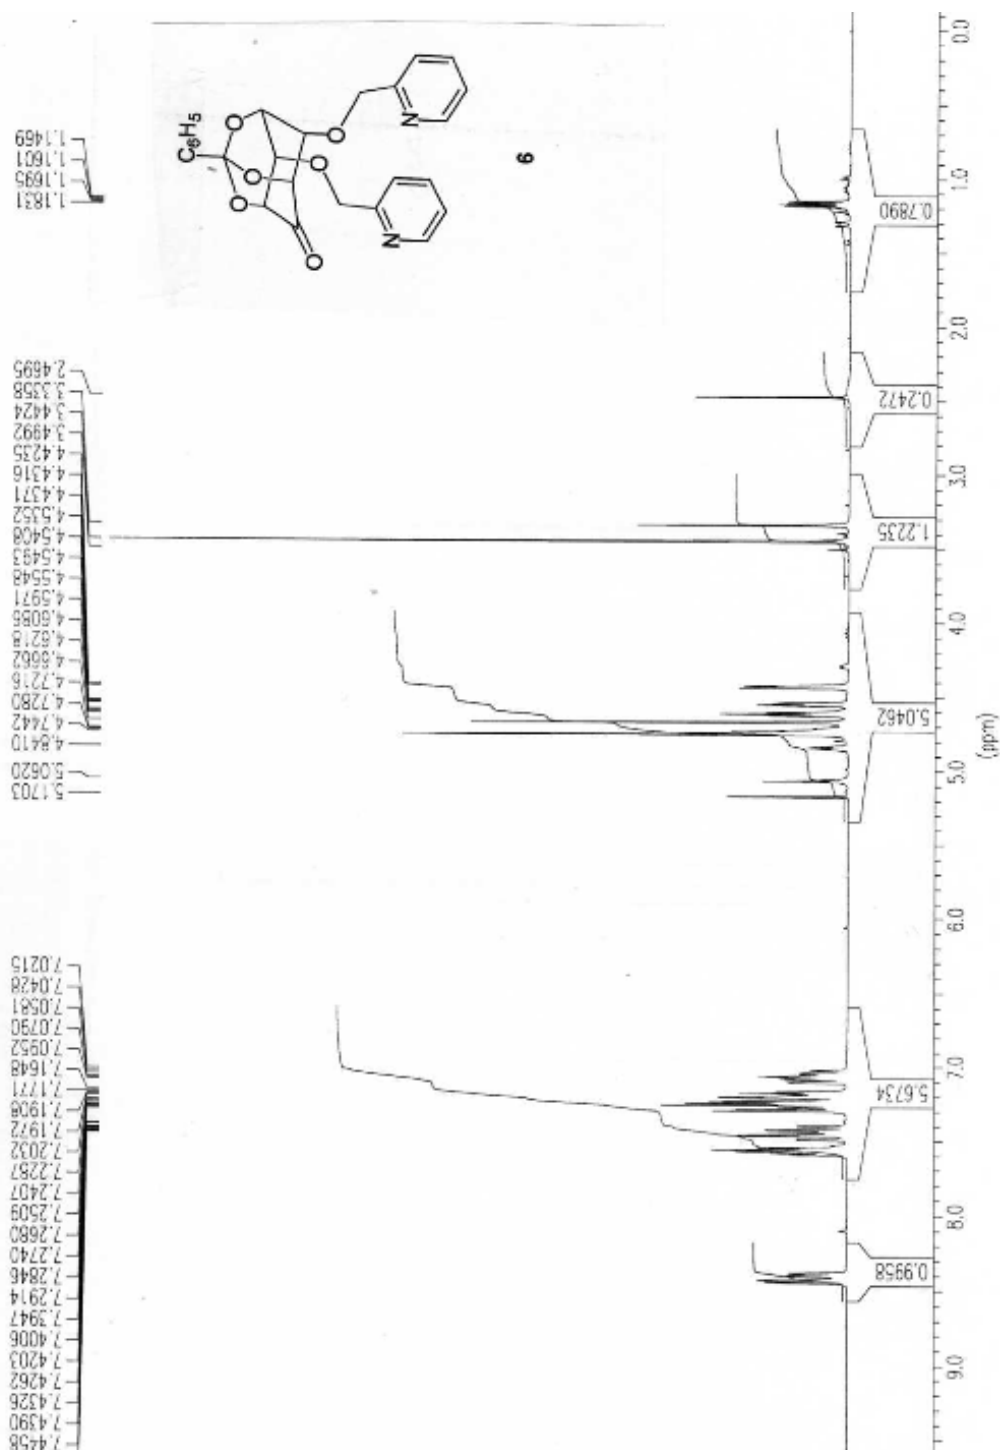

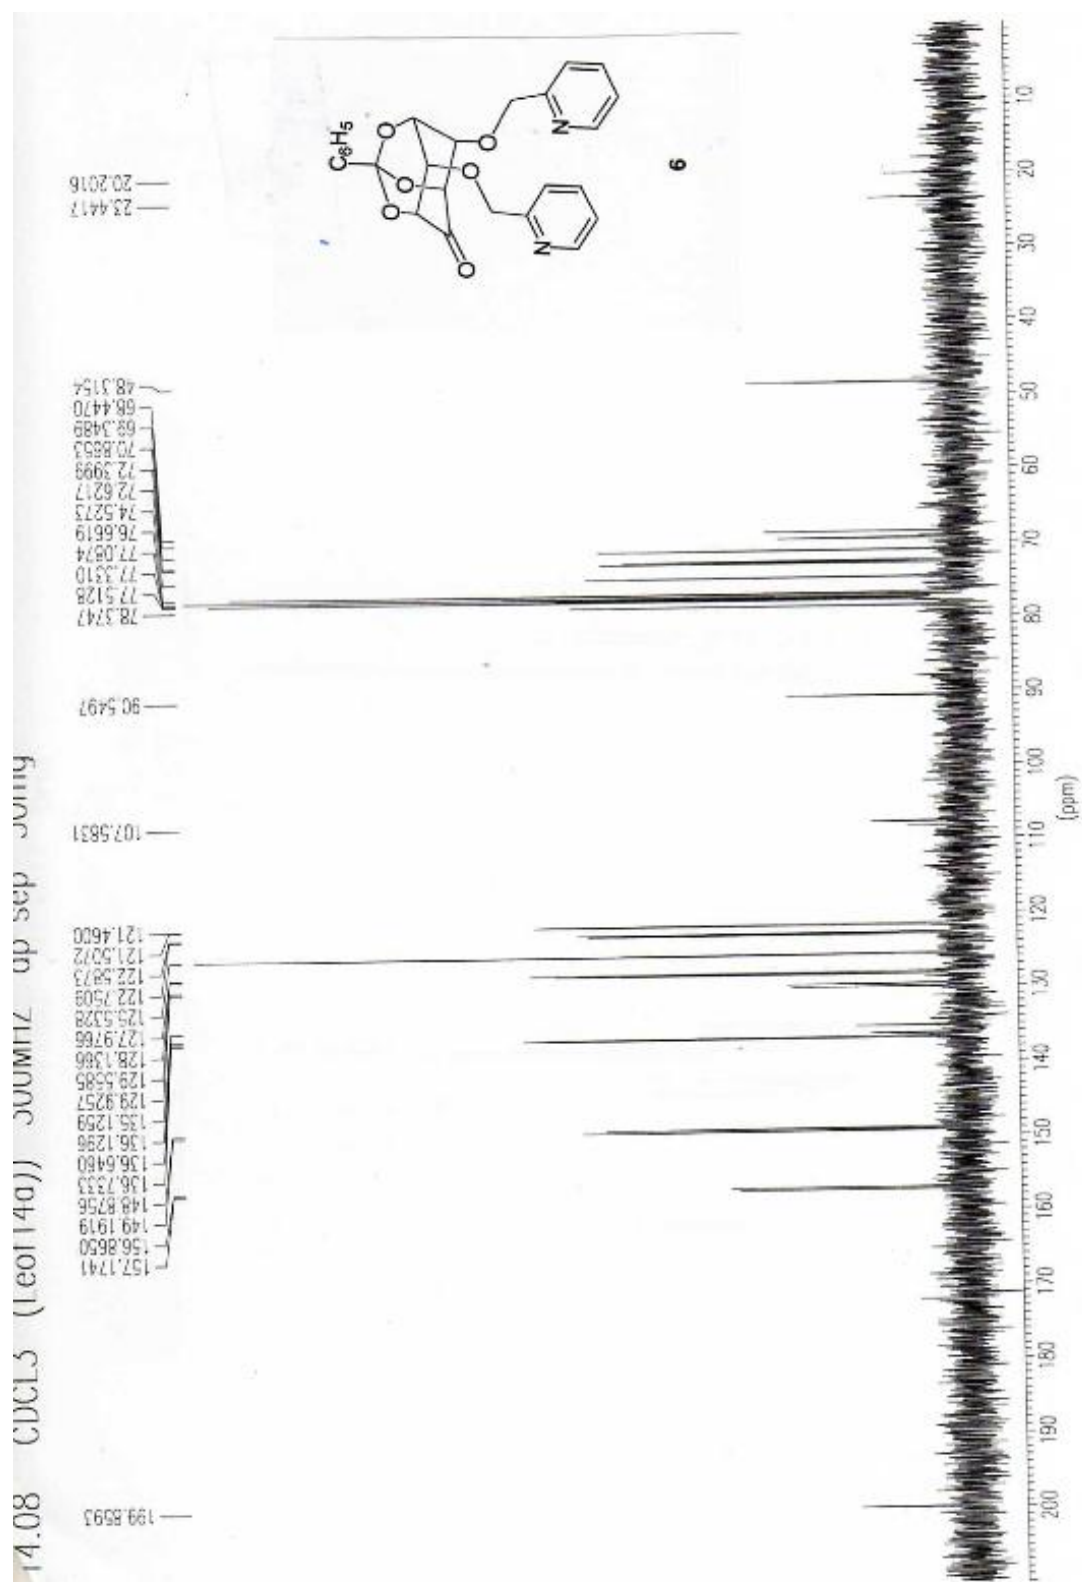

MS3.08 CDCL3 (leoms3.08) 300MHZ

8.4483  
8.4483  
7.5714  
7.5637  
7.5513  
7.5385  
7.5189  
7.5130  
7.4929  
7.4874  
7.4673  
7.4613  
7.2946  
7.2860  
7.2720  
7.2327  
7.2067  
7.1879  
7.1231  
7.1048  
7.0817

4.8190  
4.7806  
4.7017  
4.6352  
4.6288  
4.5375  
4.5456  
4.1489

1.2242  
1.1858

0.0001

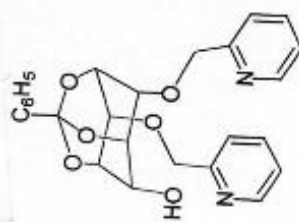

7

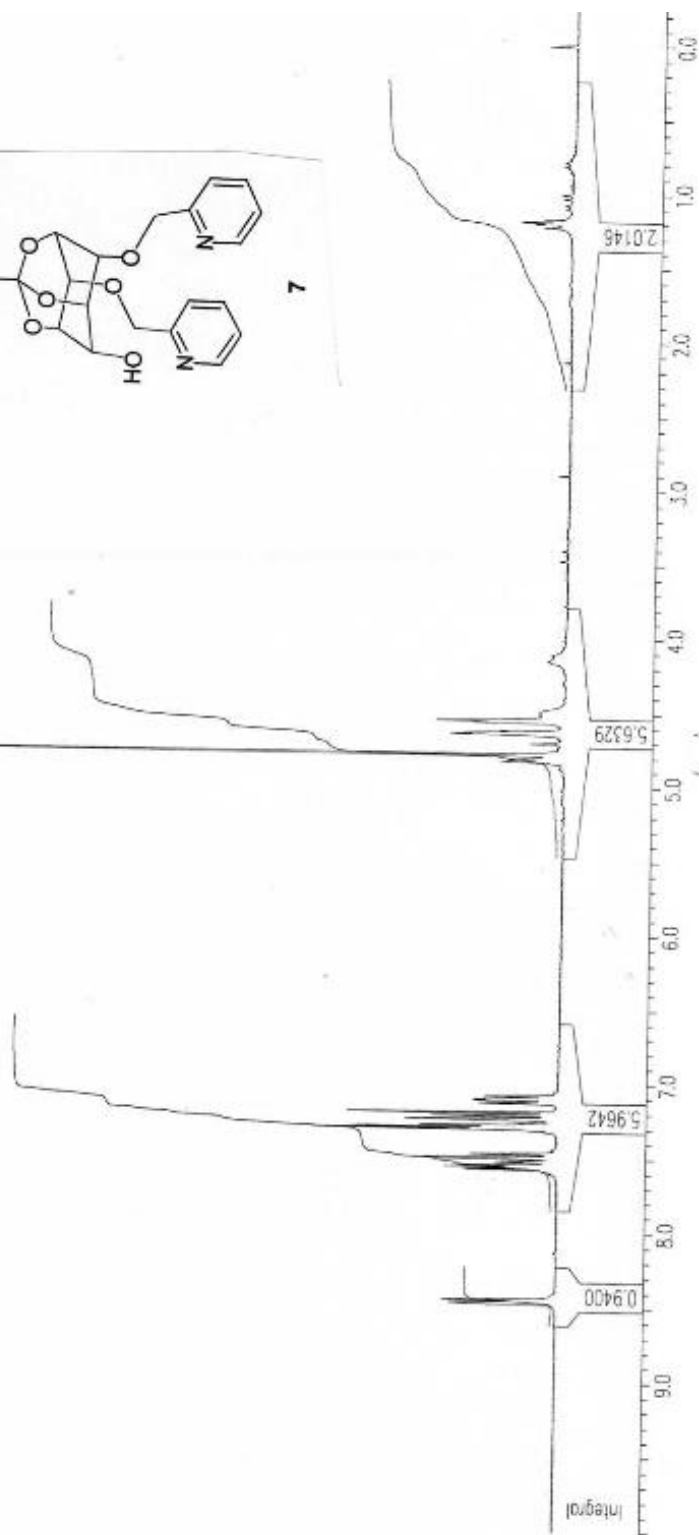

cone CDCl3 /opt/topspin se:

Current Data Parameters  
 NAME lec  
 EXPNO 1  
 PROCNO 1  
 F2 - Acquisition Parameters  
 Date\_ 20080311  
 Time 1.21  
 INSTRUM spect  
 PROBRD 5 mm QNP 1H/1  
 PULPROG zgpg30  
 TD 32768  
 SOLVENT CDCl3  
 NS 8602

157.111  
 149.195  
 148.912  
 136.696  
 136.347  
 129.943  
 129.591  
 128.069  
 125.386  
 122.663  
 121.521  
 121.277  
 107.632  
 78.398  
 77.443  
 77.222  
 77.020  
 76.596  
 73.727  
 72.676  
 72.451  
 70.036  
 69.384  
 68.724  
 66.836  
 30.894  
 29.695

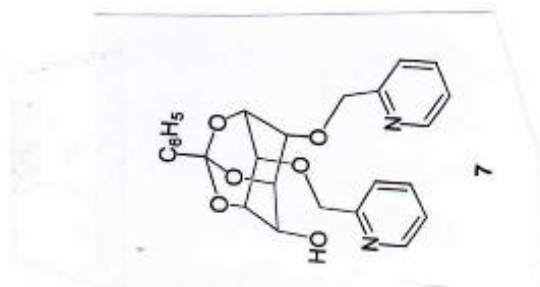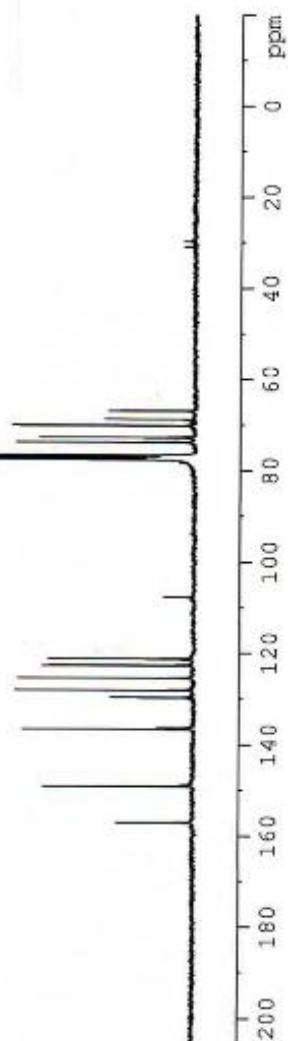

Supplement: Additional file 1 [file 1860-5397-6-115-S1.pdf]
